# Supplementary material for: Brain eQTLs of European, African American, and Asian ancestry improve interpretation of schizophrenia GWAS
Source: bioRxiv or medRxiv preprint supplement (doi:10.1101/2024.02.13.24301833), 2024-02-16

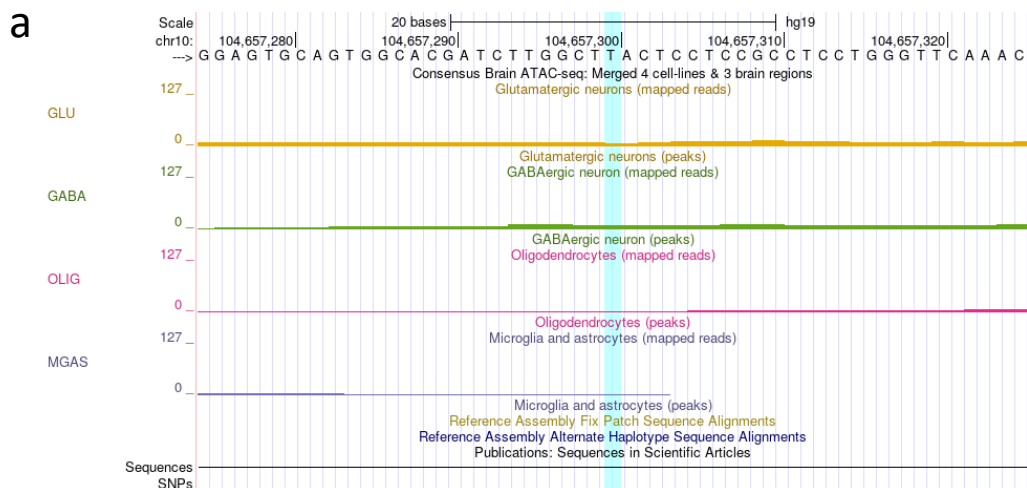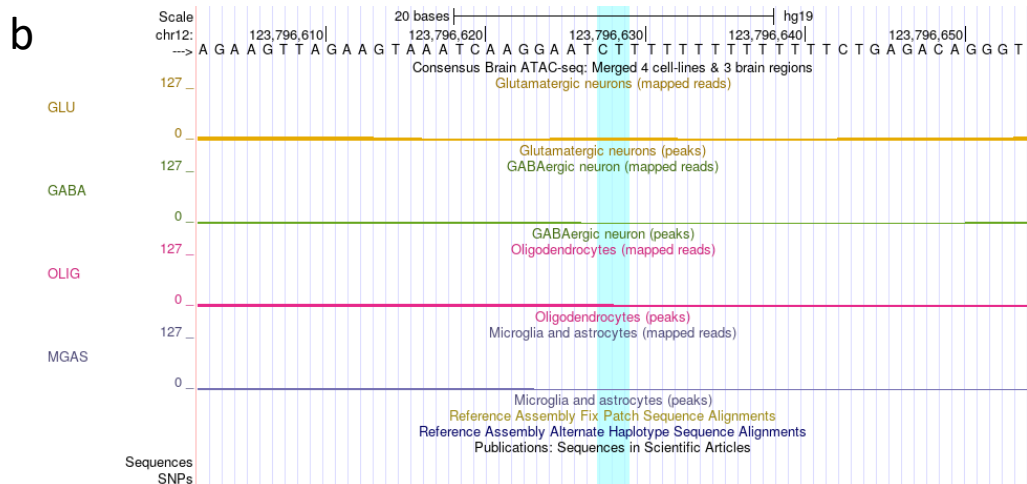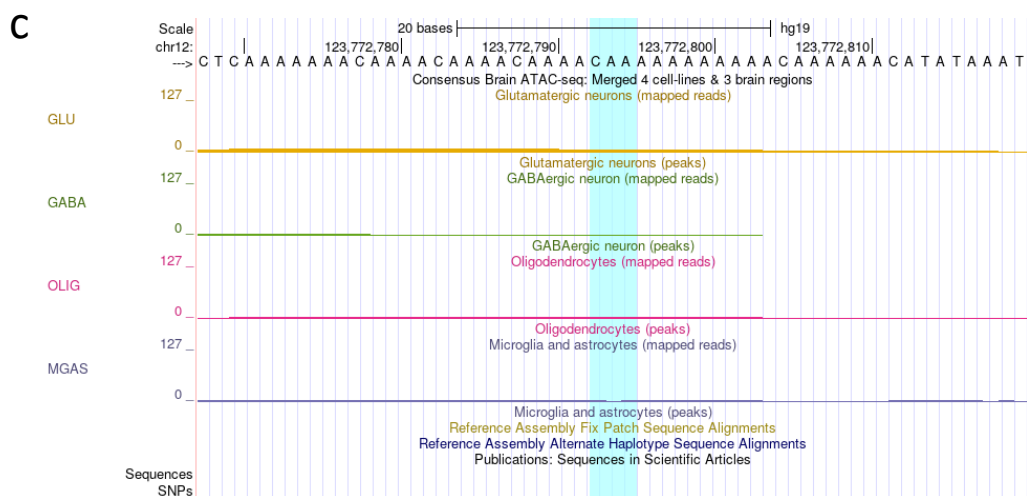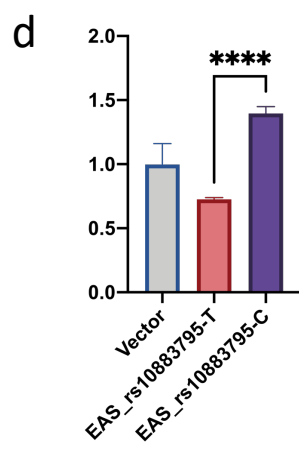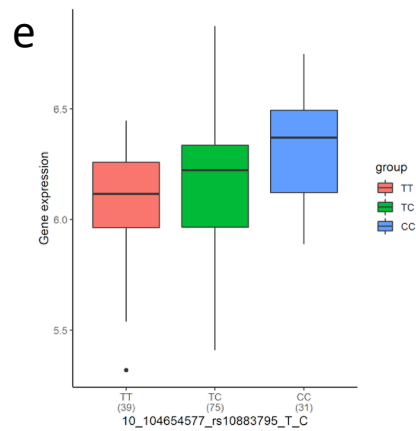

Supplement: Supplementary file [file media-4.pdf]
